# Supplementary material
Source: PubMed Central journal article supplement (PMC6105459)
Supplement: NIHMS969670-supplement-2.pdf [file NIHMS969670-supplement-2.pdf]

## SUPPLEMENTARY METHODS

### Whole-exome and targeted massively parallel sequencing

Tumor and matched normal DNA samples were subjected to whole-exome sequencing (n=9) or massively parallel sequencing (n=15) using the Memorial Sloan Kettering-Integrated Mutation Profiling of Actionable Cancer Targets (MSK-IMPACT) assay targeting all exons of 341 key cancer genes, as previously described [1,2]. Sequence reads were aligned to the human reference genome GRCh37 using the Burrows-Wheeler Aligner (BWA, v0.7.10) [3], and local realignment, duplicate removal and base quality recalibration were performed using the Genome Analysis Toolkit (GATK, v3.1.1) [4]. Variant calling was performed as previously described [2,5]. In brief, single nucleotide variants (SNVs) were identified using MuTect (v1.0) [6], small insertions and deletions (indels) using Strelka (v2.0.15) [7] and VarScan 2 (v2.3.7) [8], and copy number alterations and loss of heterozygosity (LOH) using FACETS [9]. Mutation hotspots were assigned according to Chang *et al* [10]. Cancer cell fractions of each mutation and whether these mutations were clonal or subclonal were inferred using ABSOLUTE (v1.0.6) [11], as previously described [2,5]. Mutational signatures were defined for cases with at least 20 somatic mutations using deconstructSigs [12].

### Supplementary References

- [1] Cheng DT, Mitchell TN, Zehir A, Shah RH, Benayed R, Syed A, et al. Memorial Sloan Kettering-Integrated Mutation Profiling of Actionable Cancer Targets (MSK-IMPACT): A Hybridization Capture-Based Next-Generation Sequencing Clinical Assay for Solid Tumor Molecular Oncology. *J Mol Diagn* 17 (2015) 251-264.
- [2] Ng CKY, Piscuoglio S, Geyer FC, Burke KA, Pareja F, Eberle CA, et al. The Landscape of Somatic Genetic Alterations in Metaplastic Breast Carcinomas. *Clin Cancer Res* 23 (2017) 3859-3870.
- [3] Li H, Durbin R. Fast and accurate short read alignment with Burrows-Wheeler transform. *Bioinformatics* 25 (2009) 1754-1760.
- [4] DePristo MA, Banks E, Poplin R, Garimella KV, Maguire JR, Hartl C, et al. A framework for variation discovery and genotyping using next-generation DNA sequencing data. *Nat Genet* 43 (2011) 491-498.

- [5] DeLair DF, Burke KA, Selenica P, Lim RS, Scott SN, Middha S, et al. The genetic landscape of endometrial clear cell carcinomas. *J Pathol* 243 (2017) 230-241.
- [6] Cibulskis K, Lawrence MS, Carter SL, Sivachenko A, Jaffe D, Sougnez C, et al. Sensitive detection of somatic point mutations in impure and heterogeneous cancer samples. *Nat Biotechnol* 31 (2013) 213-219.
- [7] Saunders CT, Wong WS, Swamy S, Becq J, Murray LJ, Cheetham RK. Strelka: accurate somatic small-variant calling from sequenced tumor-normal sample pairs. *Bioinformatics* 28 (2012) 1811-1817.
- [8] Koboldt DC, Zhang Q, Larson DE, Shen D, McLellan MD, Lin L, et al. VarScan 2: somatic mutation and copy number alteration discovery in cancer by exome sequencing. *Genome Res* 22 (2012) 568-576.
- [9] Shen R, Seshan VE. FACETS: allele-specific copy number and clonal heterogeneity analysis tool for high-throughput DNA sequencing. *Nucleic Acids Res* 44 (2016) e131.
- [10] Chang MT, Asthana S, Gao SP, Lee BH, Chapman JS, Kandoth C, et al. Identifying recurrent mutations in cancer reveals widespread lineage diversity and mutational specificity. *Nat Biotechnol* 34 (2016) 155-163.
- [11] Carter SL, Cibulskis K, Helman E, McKenna A, Shen H, Zack T, et al. Absolute quantification of somatic DNA alterations in human cancer. *Nat Biotechnol* 30 (2012) 413-421.
- [12] Rosenthal R, McGranahan N, Herrero J, Taylor BS, Swanton C. DeconstructSigs: delineating mutational processes in single tumors distinguishes DNA repair deficiencies and patterns of carcinoma evolution. *Genome Biol* 17 (2016) 31.
