# Supplementary material
Source: PubMed Central journal article supplement (PMC6105459)
Supplement: NIHMS969670-supplement-3.pdf [file NIHMS969670-supplement-3.pdf]

Supplementary Table S1. Sequencing statistics.

| Whole-exome sequencing |                  |             |                        |                          |                         |                          |                          |                          |                          |                          |                           |
|------------------------|------------------|-------------|------------------------|--------------------------|-------------------------|--------------------------|--------------------------|--------------------------|--------------------------|--------------------------|---------------------------|
| Sample ID              | Target Territory | Total Reads | Percent Selected Bases | Mean Target Coverage (X) | Percent Target Bases 2X | Percent Target Bases 10X | Percent Target Bases 20X | Percent Target Bases 30X | Percent Target Bases 40X | Percent Target Bases 50X | Percent Target Bases 100X |
| MOC01T                 | 51189318         | 147482208   | 0.809                  | 127.41                   | 0.998                   | 0.995                    | 0.988                    | 0.976                    | 0.955                    | 0.923                    | 0.636                     |
| MOC01N                 | 51189318         | 96659605    | 0.753                  | 81.17                    | 0.997                   | 0.989                    | 0.968                    | 0.928                    | 0.864                    | 0.778                    | 0.293                     |
| MOC05T                 | 51189318         | 171056570   | 0.805                  | 141.25                   | 0.998                   | 0.994                    | 0.987                    | 0.974                    | 0.955                    | 0.927                    | 0.674                     |
| MOC05N                 | 51189318         | 166809860   | 0.819                  | 150.81                   | 0.998                   | 0.995                    | 0.990                    | 0.981                    | 0.967                    | 0.948                    | 0.749                     |
| MOC09T                 | 51189318         | 119891686   | 0.810                  | 106.08                   | 0.998                   | 0.992                    | 0.979                    | 0.954                    | 0.915                    | 0.860                    | 0.483                     |
| MOC09N                 | 51189318         | 127118366   | 0.851                  | 117.37                   | 0.998                   | 0.994                    | 0.985                    | 0.970                    | 0.945                    | 0.909                    | 0.589                     |
| MOC10T                 | 51189318         | 101334916   | 0.815                  | 92.27                    | 0.998                   | 0.992                    | 0.977                    | 0.946                    | 0.898                    | 0.830                    | 0.394                     |
| MOC10N                 | 51189318         | 142985579   | 0.863                  | 131.66                   | 0.998                   | 0.995                    | 0.988                    | 0.976                    | 0.958                    | 0.931                    | 0.668                     |
| MOC30T                 | 51189318         | 154908848   | 0.807                  | 136.52                   | 0.998                   | 0.995                    | 0.988                    | 0.977                    | 0.959                    | 0.932                    | 0.683                     |
| MOC30N                 | 51189318         | 180928486   | 0.801                  | 156.44                   | 0.998                   | 0.995                    | 0.990                    | 0.981                    | 0.968                    | 0.950                    | 0.761                     |
| MOC32T                 | 51189318         | 156489344   | 0.827                  | 139.34                   | 0.998                   | 0.995                    | 0.988                    | 0.975                    | 0.955                    | 0.926                    | 0.672                     |
| MOC32N                 | 51189318         | 134947603   | 0.790                  | 119.09                   | 0.998                   | 0.994                    | 0.985                    | 0.969                    | 0.944                    | 0.907                    | 0.590                     |
| MOC37T                 | 51189318         | 154908765   | 0.811                  | 136.71                   | 0.998                   | 0.995                    | 0.987                    | 0.973                    | 0.952                    | 0.921                    | 0.660                     |
| MOC37N                 | 51189318         | 108290335   | 0.824                  | 99.54                    | 0.998                   | 0.993                    | 0.979                    | 0.955                    | 0.916                    | 0.860                    | 0.456                     |
| MOC59T                 | 51189318         | 114616671   | 0.833                  | 101.15                   | 0.998                   | 0.993                    | 0.978                    | 0.949                    | 0.902                    | 0.838                    | 0.435                     |
| MOC59N                 | 51189318         | 133351663   | 0.808                  | 119.43                   | 0.998                   | 0.994                    | 0.985                    | 0.970                    | 0.945                    | 0.909                    | 0.595                     |
| MOC73T                 | 51189318         | 115678196   | 0.819                  | 103.93                   | 0.998                   | 0.993                    | 0.981                    | 0.959                    | 0.923                    | 0.871                    | 0.485                     |
| MOC73N                 | 51189318         | 162669867   | 0.805                  | 143.18                   | 0.998                   | 0.995                    | 0.989                    | 0.979                    | 0.963                    | 0.941                    | 0.717                     |

| Targeted sequencing (MSK-IMPACT) |                  |             |                        |                          |                         |                          |                          |                          |                          |                          |                           |
|----------------------------------|------------------|-------------|------------------------|--------------------------|-------------------------|--------------------------|--------------------------|--------------------------|--------------------------|--------------------------|---------------------------|
| Sample ID                        | Target Territory | Total Reads | Percent Selected Bases | Mean Target Coverage (X) | Percent Target Bases 2X | Percent Target Bases 10X | Percent Target Bases 20X | Percent Target Bases 30X | Percent Target Bases 40X | Percent Target Bases 50X | Percent Target Bases 100X |
| MOC04P                           | 1204666          | 51100127    | 0.681                  | 260.12                   | 0.991                   | 0.988                    | 0.985                    | 0.983                    | 0.981                    | 0.980                    | 0.968                     |
| MOC04N                           | 1204666          | 20648388    | 0.869                  | 485.28                   | 0.991                   | 0.986                    | 0.983                    | 0.979                    | 0.976                    | 0.972                    | 0.951                     |
| MOC17P                           | 1204666          | 56574807    | 0.700                  | 335.22                   | 0.991                   | 0.988                    | 0.986                    | 0.984                    | 0.983                    | 0.981                    | 0.974                     |
| MOC17N                           | 1204666          | 23543056    | 0.835                  | 353.69                   | 0.989                   | 0.985                    | 0.982                    | 0.979                    | 0.976                    | 0.973                    | 0.950                     |
| MOC19M                           | 1204666          | 59198749    | 0.249                  | 31.79                    | 0.992                   | 0.968                    | 0.807                    | 0.491                    | 0.226                    | 0.096                    | 0.008                     |
| MOC19N                           | 1204666          | 25663039    | 0.772                  | 223.05                   | 0.989                   | 0.985                    | 0.982                    | 0.978                    | 0.974                    | 0.970                    | 0.932                     |
| MOC21M                           | 1204666          | 40418657    | 0.804                  | 539.60                   | 0.991                   | 0.988                    | 0.986                    | 0.984                    | 0.983                    | 0.981                    | 0.974                     |
| MOC21N                           | 1204666          | 25242298    | 0.838                  | 351.24                   | 0.993                   | 0.990                    | 0.987                    | 0.984                    | 0.982                    | 0.979                    | 0.961                     |
| MOC25P                           | 1204666          | 53178659    | 0.789                  | 619.69                   | 0.993                   | 0.991                    | 0.989                    | 0.988                    | 0.986                    | 0.985                    | 0.980                     |
| MOC25N                           | 1204666          | 23213243    | 0.792                  | 241.30                   | 0.991                   | 0.986                    | 0.982                    | 0.979                    | 0.976                    | 0.971                    | 0.937                     |
| MOC31P                           | 1204666          | 53350281    | 0.750                  | 336.75                   | 0.992                   | 0.990                    | 0.988                    | 0.985                    | 0.983                    | 0.981                    | 0.964                     |
| MOC31N                           | 1204666          | 21096526    | 0.840                  | 346.46                   | 0.990                   | 0.986                    | 0.981                    | 0.976                    | 0.972                    | 0.966                    | 0.924                     |
| MOC38P                           | 1204666          | 32398630    | 0.326                  | 27.03                    | 0.992                   | 0.952                    | 0.677                    | 0.330                    | 0.139                    | 0.064                    | 0.004                     |
| MOC38N                           | 1204666          | 31353190    | 0.296                  | 27.33                    | 0.987                   | 0.910                    | 0.653                    | 0.379                    | 0.179                    | 0.075                    | 0.004                     |
| MOC46P                           | 1204666          | 15831960    | 0.790                  | 266.31                   | 0.989                   | 0.982                    | 0.973                    | 0.962                    | 0.950                    | 0.936                    | 0.866                     |
| MOC46N                           | 1204666          | 6552075     | 0.802                  | 108.36                   | 0.985                   | 0.961                    | 0.928                    | 0.893                    | 0.856                    | 0.818                    | 0.545                     |
| MOC48P                           | 1204666          | 14778488    | 0.720                  | 157.25                   | 0.989                   | 0.981                    | 0.969                    | 0.952                    | 0.932                    | 0.911                    | 0.763                     |
| MOC48N                           | 1204666          | 6874475     | 0.625                  | 47.35                    | 0.981                   | 0.936                    | 0.854                    | 0.737                    | 0.578                    | 0.403                    | 0.043                     |
| MOC51P                           | 1204666          | 12760382    | 0.753                  | 168.08                   | 0.990                   | 0.982                    | 0.971                    | 0.957                    | 0.938                    | 0.918                    | 0.797                     |
| MOC51N                           | 1204666          | 6473950     | 0.800                  | 116.52                   | 0.985                   | 0.961                    | 0.931                    | 0.899                    | 0.865                    | 0.828                    | 0.585                     |
| MOC52P                           | 1204666          | 11089449    | 0.753                  | 144.07                   | 0.988                   | 0.977                    | 0.959                    | 0.938                    | 0.917                    | 0.894                    | 0.738                     |
| MOC52N                           | 1204666          | 5893896     | 0.806                  | 107.54                   | 0.984                   | 0.958                    | 0.924                    | 0.887                    | 0.846                    | 0.795                    | 0.486                     |
| MOC60P                           | 1204666          | 16653353    | 0.797                  | 302.73                   | 0.990                   | 0.984                    | 0.975                    | 0.963                    | 0.950                    | 0.937                    | 0.868                     |
| MOC60N                           | 1204666          | 11204497    | 0.823                  | 219.50                   | 0.992                   | 0.984                    | 0.969                    | 0.950                    | 0.932                    | 0.913                    | 0.819                     |
| MOC62P                           | 1204666          | 19027865    | 0.814                  | 372.21                   | 0.991                   | 0.985                    | 0.978                    | 0.969                    | 0.959                    | 0.949                    | 0.897                     |
| MOC62N                           | 1204666          | 8813478     | 0.828                  | 179.69                   | 0.989                   | 0.975                    | 0.954                    | 0.932                    | 0.911                    | 0.889                    | 0.760                     |
| MOC67M                           | 1204666          | 15910979    | 0.718                  | 190.02                   | 0.988                   | 0.980                    | 0.968                    | 0.952                    | 0.935                    | 0.917                    | 0.796                     |
| MOC67N                           | 1204666          | 5819402     | 0.757                  | 75.41                    | 0.984                   | 0.957                    | 0.912                    | 0.862                    | 0.803                    | 0.733                    | 0.257                     |
| MOC72P                           | 1204666          | 14615063    | 0.809                  | 278.74                   | 0.991                   | 0.984                    | 0.976                    | 0.965                    | 0.952                    | 0.939                    | 0.877                     |
| MOC72N                           | 1204666          | 8199064     | 0.817                  | 163.17                   | 0.988                   | 0.974                    | 0.951                    | 0.929                    | 0.908                    | 0.884                    | 0.754                     |
