# Supplementary material
Source: PubMed Central journal article supplement (PMC6105459)
Supplement: NIHMS969670-supplement-4.pdf [file NIHMS969670-supplement-4.pdf]

Supplementary Table 2  
Page 5 of 5

|        |    |           |                     |   |         |                |                   |       |             |             |     |     |      |           |                   |
|--------|----|-----------|---------------------|---|---------|----------------|-------------------|-------|-------------|-------------|-----|-----|------|-----------|-------------------|
| MOC62T | 9  | 5090747   | G                   | T | JAK2    | p.E965D        | Missense_Mutation | FALSE | 0.040540541 | 0           | 148 | 84  | 0.34 | Subclonal | likely_pathogenic |
| MOC62T | 9  | 8319898   | C                   | A | PTRPRD  | p.G1868V       | Missense_Mutation | FALSE | 0.038461538 | 0           | 416 | 252 | 0.32 | Subclonal | likely_pathogenic |
| MOC62T | 9  | 8518276   | C                   | A | PTRPRD  | p.G372V        | Missense_Mutation | FALSE | 0.039130435 | 0           | 230 | 114 | 0.33 | Subclonal | passenger         |
| MOC62T | 9  | 8528862   | A                   | T | PTRPRD  | p.I157N        | Missense_Mutation | FALSE | 0.040463558 | 0           | 302 | 164 | 0.36 | Subclonal | likely_pathogenic |
| MOC62T | 9  | 8637406   | C                   | T | PTRPRD  | p.R58Q         | Missense_Mutation | FALSE | 0.0625      | 0           | 352 | 177 | 0.62 | Subclonal | likely_pathogenic |
| MOC62T | 9  | 8733794   | C                   | T | PTRPRD  | p.R17H         | Missense_Mutation | FALSE | 0.057432432 | 0           | 296 | 146 | 0.48 | Subclonal | passenger         |
| MOC62T | 9  | 8732640   | G                   | T | NTRK2   | p.D173Y        | Missense_Mutation | FALSE | 0.054404145 | 0           | 386 | 220 | 0.45 | Subclonal | likely_pathogenic |
| MOC62T | 9  | 98270582  | A                   | C | PTCH1   | p.I21S         | Missense_Mutation | FALSE | 0.076271186 | 0           | 118 | 76  | 0.64 | Subclonal | likely_pathogenic |
| MOC62T | 23 | 1314969   | T                   | G | CRLF2   | p.K231T        | Missense_Mutation | FALSE | 0.041401274 | 0           | 314 | 89  | 0.39 | Subclonal | passenger         |
| MOC62T | 23 | 39911509  | G                   | T | BCOR    | p.F1707L       | Missense_Mutation | FALSE | 0.051820728 | 0           | 714 | 323 | 0.48 | Subclonal | likely_pathogenic |
| MOC62T | 23 | 39922917  | G                   | A | BCOR    | p.A1264V       | Missense_Mutation | FALSE | 0.038358164 | 0           | 365 | 132 | 0.36 | Subclonal | likely_pathogenic |
| MOC62T | 23 | 39932617  | G                   | A | BCOR    | p.P991L        | Missense_Mutation | FALSE | 0.03125     | 0           | 320 | 115 | 0.29 | Subclonal | passenger         |
| MOC62T | 23 | 63411963  | C                   | A | BCOR    | p.K219N        | Missense_Mutation | FALSE | 0.050880626 | 0           | 511 | 156 | 0.47 | Subclonal | passenger         |
| MOC62T | 23 | 44894222  | A                   | C | KDM6A   | p.N204T        | Missense_Mutation | FALSE | 0.064981949 | 0           | 554 | 363 | 0.61 | Subclonal | passenger         |
| MOC62T | 23 | 44949014  | C                   | A | KDM6A   | p.S1192Y       | Missense_Mutation | FALSE | 0.049918367 | 0           | 392 | 213 | 0.43 | Subclonal | likely_pathogenic |
| MOC62T | 23 | 4496727   | T                   | G | KDM6A   | p.I1317M       | Missense_Mutation | FALSE | 0.031428571 | 0           | 700 | 478 | 0.29 | Subclonal | passenger         |
| MOC62T | 23 | 53239748  | T                   | C | KDM5C   | p.K532E        | Missense_Mutation | FALSE | 0.044176707 | 0           | 408 | 190 | 0.41 | Subclonal | likely_pathogenic |
| MOC62T | 23 | 53240825  | C                   | T | KDM5C   | p.E419K        | Missense_Mutation | FALSE | 0.044217687 | 0           | 588 | 216 | 0.41 | Subclonal | passenger         |
| MOC62T | 23 | 63410667  | G                   | T | AMER1   | p.L834I        | Missense_Mutation | FALSE | 0.035947712 | 0           | 612 | 243 | 0.34 | Subclonal | passenger         |
| MOC62T | 23 | 6393223   | C                   | A | AMER1   | p.E548D        | Missense_Mutation | FALSE | 0.041178477 | 0           | 340 | 105 | 0.38 | Subclonal | passenger         |
| MOC62T | 23 | 63411963  | C                   | A | AMER1   | p.G435V        | Missense_Mutation | FALSE | 0.05112762  | 0           | 605 | 232 | 0.48 | Subclonal | passenger         |
| MOC62T | 23 | 70341515  | C                   | T | MED12   | p.S317F        | Missense_Mutation | FALSE | 0.025673941 | 0           | 779 | 340 | 0.24 | Subclonal | passenger         |
| MOC62T | 23 | 76763854  | C                   | T | ATRX    | p.G2485E       | Missense_Mutation | FALSE | 0.046413502 | 0           | 474 | 248 | 0.43 | Subclonal | passenger         |
| MOC62T | 23 | 76764055  | T                   | C | ATRX    | p.Y2418Y       | Missense_Mutation | FALSE | 0.027972028 | 0           | 715 | 373 | 0.26 | Subclonal | passenger         |
| MOC62T | 23 | 76849266  | C                   | A | ATRX    | p.D2004Y       | Missense_Mutation | FALSE | 0.047854785 | 0           | 606 | 300 | 0.45 | Subclonal | passenger         |
| MOC62T | 23 | 76937236  | C                   | A | ATRX    | p.R1171I       | Missense_Mutation | FALSE | 0.054054054 | 0           | 592 | 339 | 0.5  | Subclonal | passenger         |
| MOC62T | 23 | 76937258  | C                   | A | ATRX    | p.D1164Y       | Missense_Mutation | FALSE | 0.041894158 | 0           | 505 | 289 | 0.39 | Subclonal | passenger         |
| MOC62T | 23 | 76937356  | C                   | A | ATRX    | p.R1131I       | Missense_Mutation | FALSE | 0.040071355 | 0           | 363 | 204 | 0.41 | Subclonal | likely_pathogenic |
| MOC62T | 23 | 76938330  | C                   | A | ATRX    | p.R306N        | Missense_Mutation | FALSE | 0.045226131 | 0           | 398 | 213 | 0.42 | Subclonal | likely_pathogenic |
| MOC62T | 23 | 76944355  | C                   | A | ATRX    | p.D184Y        | Missense_Mutation | FALSE | 0.043405676 | 0           | 599 | 337 | 0.41 | Subclonal | passenger         |
| MOC62T | 23 | 76949418  | T                   | G | ATRX    | p.I127L        | Missense_Mutation | FALSE | 0.045833333 | 0           | 480 | 273 | 0.43 | Subclonal | passenger         |
| MOC62T | 23 | 76953080  | C                   | T | ATRX    | p.R78Q         | Missense_Mutation | FALSE | 0.038720539 | 0.005347594 | 594 | 374 | 0.36 | Subclonal | passenger         |
| MOC62T | 23 | 100608323 | T                   | G | BTK     | p.E589D        | Missense_Mutation | FALSE | 0.037527254 | 0           | 346 | 124 | 0.35 | Subclonal | likely_pathogenic |
| MOC62T | 23 | 100615608 | A                   | C | BTK     | p.F242V        | Missense_Mutation | FALSE | 0.032307692 | 0           | 650 | 253 | 0.3  | Subclonal | passenger         |
| MOC62T | 23 | 100630232 | G                   | A | BTK     | p.S14F         | Missense_Mutation | FALSE | 0.031007752 | 0           | 645 | 226 | 0.29 | Subclonal | passenger         |
| MOC62T | 23 | 123164844 | A                   | G | STAG2   | p.K53E         | Missense_Mutation | FALSE | 0.040369388 | 0           | 474 | 248 | 0.37 | Subclonal | passenger         |
| MOC62T | 23 | 123203413 | A                   | C | STAG2   | p.K1024Q       | Missense_Mutation | FALSE | 0.052752294 | 0           | 436 | 237 | 0.49 | Subclonal | passenger         |
| MOC62T | 17 | 29677227  | C                   | T | NF1     | p.R245Q*       | Nonsense_Mutation | FALSE | 0.044742729 | 0.003837008 | 447 | 254 | 0.37 | Subclonal | likely_pathogenic |
| MOC62T | 2  | 25976476  | G                   | A | ASXL2   | p.R357*        | Nonsense_Mutation | FALSE | 0.043280182 | 0           | 439 | 263 | 0.36 | Subclonal | passenger         |
| MOC62T | 1  | 27059183  | C                   | A | ARID1A  | p.S607*        | Nonsense_Mutation | FALSE | 0.036613272 | 0           | 437 | 211 | 0.31 | Subclonal | likely_pathogenic |
| MOC62T | 11 | 94192996  | C                   | A | MRE11A  | p.E460*        | Nonsense_Mutation | FALSE | 0.046511628 | 0           | 387 | 233 | 0.39 | Subclonal | passenger         |
| MOC62T | 11 | 108175475 | C                   | A | ATM     | p.S1857*       | Nonsense_Mutation | FALSE | 0.030487805 | 0           | 328 | 204 | 0.25 | Subclonal | likely_pathogenic |
| MOC62T | 11 | 118374582 | C                   | T | KMT2A   | p.R2656*       | Nonsense_Mutation | FALSE | 0.037463977 | 0           | 347 | 159 | 0.31 | Subclonal | likely_pathogenic |
| MOC62T | 12 | 46230538  | G                   | T | ARID2   | p.E263*        | Nonsense_Mutation | FALSE | 0.040792531 | 0           | 241 | 145 | 0.41 | Subclonal | likely_pathogenic |
| MOC62T | 16 | 2647966   | T                   | G | PDPK1   | p.Y523*        | Nonsense_Mutation | FALSE | 0.040769897 | 0           | 368 | 139 | 0.34 | Subclonal | likely_pathogenic |
| MOC62T | 16 | 67654661  | T                   | A | CTCF    | p.L383*        | Nonsense_Mutation | FALSE | 0.041564792 | 0.004694836 | 400 | 213 | 0.35 | Subclonal | likely_pathogenic |
| MOC62T | 17 | 29586092  | G                   | T | NF1     | p.E1459*       | Nonsense_Mutation | FALSE | 0.043352601 | 0.004032258 | 346 | 248 | 0.36 | Subclonal | likely_pathogenic |
| MOC62T | 17 | 37676232  | T                   | G | CDK12   | p.L996*        | Nonsense_Mutation | FALSE | 0.058295964 | 0           | 446 | 176 | 0.49 | Subclonal | likely_pathogenic |
| MOC62T | 19 | 5232347   | C                   | T | PTRPRD  | p.W852*        | Nonsense_Mutation | FALSE | 0.056338028 | 0           | 142 | 33  | 0.47 | Subclonal | passenger         |
| MOC62T | 2  | 2608357   | C                   | A | ASXL2   | p.E45*         | Nonsense_Mutation | FALSE | 0.048192771 | 0           | 166 | 134 | 0.4  | Subclonal | passenger         |
| MOC62T | 3  | 52663032  | C                   | A | PBRM1   | p.E441*        | Nonsense_Mutation | FALSE | 0.05859375  | 0           | 256 | 189 | 0.49 | Subclonal | likely_pathogenic |
| MOC62T | 3  | 70308509  | G                   | T | MIF     | p.E373*        | Nonsense_Mutation | FALSE | 0.037817555 | 0           | 319 | 186 | 0.31 | Subclonal | likely_pathogenic |
| MOC62T | 4  | 142274944 | G                   | A | ATR     | p.E706*        | Nonsense_Mutation | FALSE | 0.038585574 | 0           | 251 | 120 | 0.3  | Subclonal | likely_pathogenic |
| MOC62T | 4  | 55146574  | G                   | T | PDGFRA  | p.E750*        | Nonsense_Mutation | FALSE | 0.063973064 | 0.004694836 | 297 | 213 | 0.53 | Subclonal | likely_pathogenic |
| MOC62T | 4  | 18758474  | G                   | A | FAT1    | p.R1096*       | Nonsense_Mutation | FALSE | 0.046511628 | 0           | 258 | 154 | 0.39 | Subclonal | likely_pathogenic |
| MOC62T | 5  | 86645108  | G                   | T | RASA1   | p.E394*        | Nonsense_Mutation | FALSE | 0.043010753 | 0           | 279 | 217 | 0.36 | Subclonal | likely_pathogenic |
| MOC62T | 5  | 86672371  | G                   | T | RASA1   | p.E725*        | Nonsense_Mutation | FALSE | 0.041237113 | 0           | 194 | 120 | 0.34 | Subclonal | likely_pathogenic |
| MOC62T | 7  | 128845577 | G                   | T | SMO     | p.E292*        | Nonsense_Mutation | FALSE | 0.038709677 | 0           | 310 | 130 | 0.32 | Subclonal | likely_pathogenic |
| MOC62T | 9  | 8521370   | C                   | A | PTRPRD  | p.E290*        | Nonsense_Mutation | FALSE | 0.030674847 | 0           | 326 | 177 | 0.26 | Subclonal | passenger         |
| MOC62T | 9  | 101909998 | G                   | T | TGFBFR1 | p.E440*        | Nonsense_Mutation | FALSE | 0.03954485  | 0           | 301 | 197 | 0.3  | Subclonal | passenger         |
| MOC62T | 23 | 48650491  | C                   | A | GATA1   | p.S154*        | Nonsense_Mutation | FALSE | 0.029411785 | 0           | 680 | 185 | 0.27 | Subclonal | likely_pathogenic |
| MOC62T | 23 | 76899056  | C                   | A | ATRX    | p.E1652*       | Nonsense_Mutation | FALSE | 0.046941791 | 0           | 536 | 340 | 0.44 | Subclonal | likely_pathogenic |
| MOC62T | 23 | 76939766  | C                   | A | ATRX    | p.E328*        | Nonsense_Mutation | FALSE | 0.040665434 | 0           | 541 | 292 | 0.38 | Subclonal | likely_pathogenic |
| MOC62T | 23 | 100611821 | C                   | A | BTK     | p.E434*        | Nonsense_Mutation | FALSE | 0.041884817 | 0           | 573 | 229 | 0.39 | Subclonal | passenger         |
| MOC62T | 23 | 123211837 | C                   | T | STAG2   | p.E902*        | Nonsense_Mutation | FALSE | 0.034798535 | 0.005571031 | 546 | 359 | 0.32 | Subclonal | likely_pathogenic |
| MOC62T | 5  | 35857117  | C                   | A | ILTR    | p.S13Y         | Missense_Mutation | FALSE | 0.041884817 | 0           | 191 | 141 | 0.35 | Subclonal | likely_pathogenic |
| MOC62T | 11 | 64571891  | G                   | T | MEN1    | p.S588L        | Missense_Mutation | FALSE | 0.035487959 | 0           | 789 | 449 | 0.3  | Subclonal | likely_pathogenic |
| MOC62T | 23 | 123195522 | G                   | T | STAG2   | p.X15 splice   | Splice_Site       | FALSE | 0.04048583  | 0           | 494 | 239 | 0.38 | Subclonal | likely_pathogenic |
| MOC67T | 9  | 2191729   | CCCTCCAGCAGCGCCGCCA | G | CDKN2A  | p.RVALLER28del | In_Frame_Del      | FALSE | 0.247706422 | 0           | 109 | 42  | 0.67 | Subclonal | likely_pathogenic |
| MOC67T | 17 | 7578542   | C                   | C | TP53    | p.L130V        | Missense_Mutation | FALSE | 0.571428571 | 0           | 63  | 43  | 1    | Clonal    | likely_pathogenic |
| MOC67T | 19 | 10602493  | C                   | C | KEAP1   | p.R362Q        | Missense_Mutation | FALSE | 0.656862745 | 0           | 102 | 51  | 1    | Clonal    | passenger         |
| MOC72T | 12 | 25398281  | C                   | T | KRAS    | p.G13D         | Missense_Mutation | TRUE  | 0.352791878 | 0           | 394 | 177 | 1    | Clonal    | likely_pathogenic |
| MOC72T | 17 | 7579355   | A                   | T | TP53    | p.L111Q        | Missense_Mutation | TRUE  | 0.189781022 | 0           | 137 | 86  | 0.54 | Subclonal | likely_pathogenic |
| MOC72T | 3  | 47158140  | C                   | T | SETD2   | p.C1520Y       | Missense_Mutation | FALSE | 0.1525      | 0           | 400 | 209 | 0.43 | Subclonal | passenger         |

MAF, mutant allele fraction
