# Supplementary material
Source: PubMed Central journal article supplement (PMC6105459)
Supplement: NIHMS969670-supplement-5.pdf [file NIHMS969670-supplement-5.pdf]

**Supplementary Table S3.** Frequencies of mutations found in 341 cancer-related genes in *bona fide* mucinous ovarian cancers from this study and pancreatic ductal carcinomas (ICGC) and mucinous ovarian cancers from Ryland et al. Top significant genes are shown.

| Gene Symbol | Mucinous Ovarian Cancer, this study (n=19) |                   | Pancreatic Ductal ICGC (n=177) |                   | p-value     |
|-------------|--------------------------------------------|-------------------|--------------------------------|-------------------|-------------|
|             | Cases altered (n)                          | Cases altered (%) | Cases altered (n)              | Cases altered (%) |             |
| TP53        | 17                                         | 89.47             | 98                             | 55.37             | 0.005610326 |
| ERBB2       | 2                                          | 10.53             | 0                              | 0                 | 0.008948195 |
| SETD2       | 2                                          | 10.53             | 2                              | 1.13              | 0.04761122  |
| ALOX12B     | 1                                          | 5.26              | 0                              | 0                 | 0.09693878  |
| BRAF        | 1                                          | 5.26              | 0                              | 0                 | 0.09693878  |
| CDK12       | 1                                          | 5.26              | 0                              | 0                 | 0.09693878  |
| ERBB3       | 1                                          | 5.26              | 0                              | 0                 | 0.09693878  |
| GNAQ        | 1                                          | 5.26              | 0                              | 0                 | 0.09693878  |
| H3F3C       | 1                                          | 5.26              | 0                              | 0                 | 0.09693878  |
| IGF1R       | 1                                          | 5.26              | 0                              | 0                 | 0.09693878  |
| NCOR1       | 1                                          | 5.26              | 0                              | 0                 | 0.09693878  |
| NKX2-1      | 1                                          | 5.26              | 0                              | 0                 | 0.09693878  |
| PALB2       | 1                                          | 5.26              | 0                              | 0                 | 0.09693878  |
| PARK2       | 1                                          | 5.26              | 0                              | 0                 | 0.09693878  |
| RFWD2       | 1                                          | 5.26              | 0                              | 0                 | 0.09693878  |
| SHQ1        | 1                                          | 5.26              | 0                              | 0                 | 0.09693878  |
| TET2        | 1                                          | 5.26              | 0                              | 0                 | 0.09693878  |
| KRAS        | 15                                         | 78.95             | 160                            | 90.4              | 0.1285478   |
| SMAD4       | 1                                          | 5.26              | 38                             | 21.47             | 0.1303005   |
| ASXL1       | 1                                          | 5.26              | 1                              | 0.56              | 0.1849294   |

| Gene Symbol | Mucinous Ovarian Cancer, this study (n=19) |                   | Mucinous Ovarian Cancer, Ryland et al. (n=12) |                   | p-value    |
|-------------|--------------------------------------------|-------------------|-----------------------------------------------|-------------------|------------|
|             | Cases altered (n)                          | Cases altered (%) | Cases altered (n)                             | Cases altered (%) |            |
| RNF43       | 0                                          | 0                 | 4                                             | 33.33             | 0.01573177 |
| BRAF        | 1                                          | 5.26              | 5                                             | 41.67             | 0.0216928  |
| TP53        | 17                                         | 89.47             | 6                                             | 50                | 0.03158039 |
| KRAS        | 15                                         | 78.95             | 5                                             | 41.67             | 0.05636377 |
| BCOR        | 0                                          | 0                 | 2                                             | 16.67             | 0.1419355  |
| CDKN2A      | 2                                          | 10.53             | 4                                             | 33.33             | 0.1735058  |
| ARID1A      | 0                                          | 0                 | 1                                             | 8.33              | 0.3870968  |
| BTK         | 0                                          | 0                 | 1                                             | 8.33              | 0.3870968  |
| ERBB4       | 0                                          | 0                 | 1                                             | 8.33              | 0.3870968  |
| FAT1        | 0                                          | 0                 | 1                                             | 8.33              | 0.3870968  |
| FBXW7       | 0                                          | 0                 | 1                                             | 8.33              | 0.3870968  |
| GATA3       | 0                                          | 0                 | 1                                             | 8.33              | 0.3870968  |
| MITF        | 0                                          | 0                 | 1                                             | 8.33              | 0.3870968  |
| NOTCH3      | 0                                          | 0                 | 1                                             | 8.33              | 0.3870968  |
| PTPRS       | 0                                          | 0                 | 1                                             | 8.33              | 0.3870968  |
| TET1        | 0                                          | 0                 | 1                                             | 8.33              | 0.3870968  |
